# Supplementary material
Source: PubMed Central journal article supplement (PMC5479689)

Figure 2f:

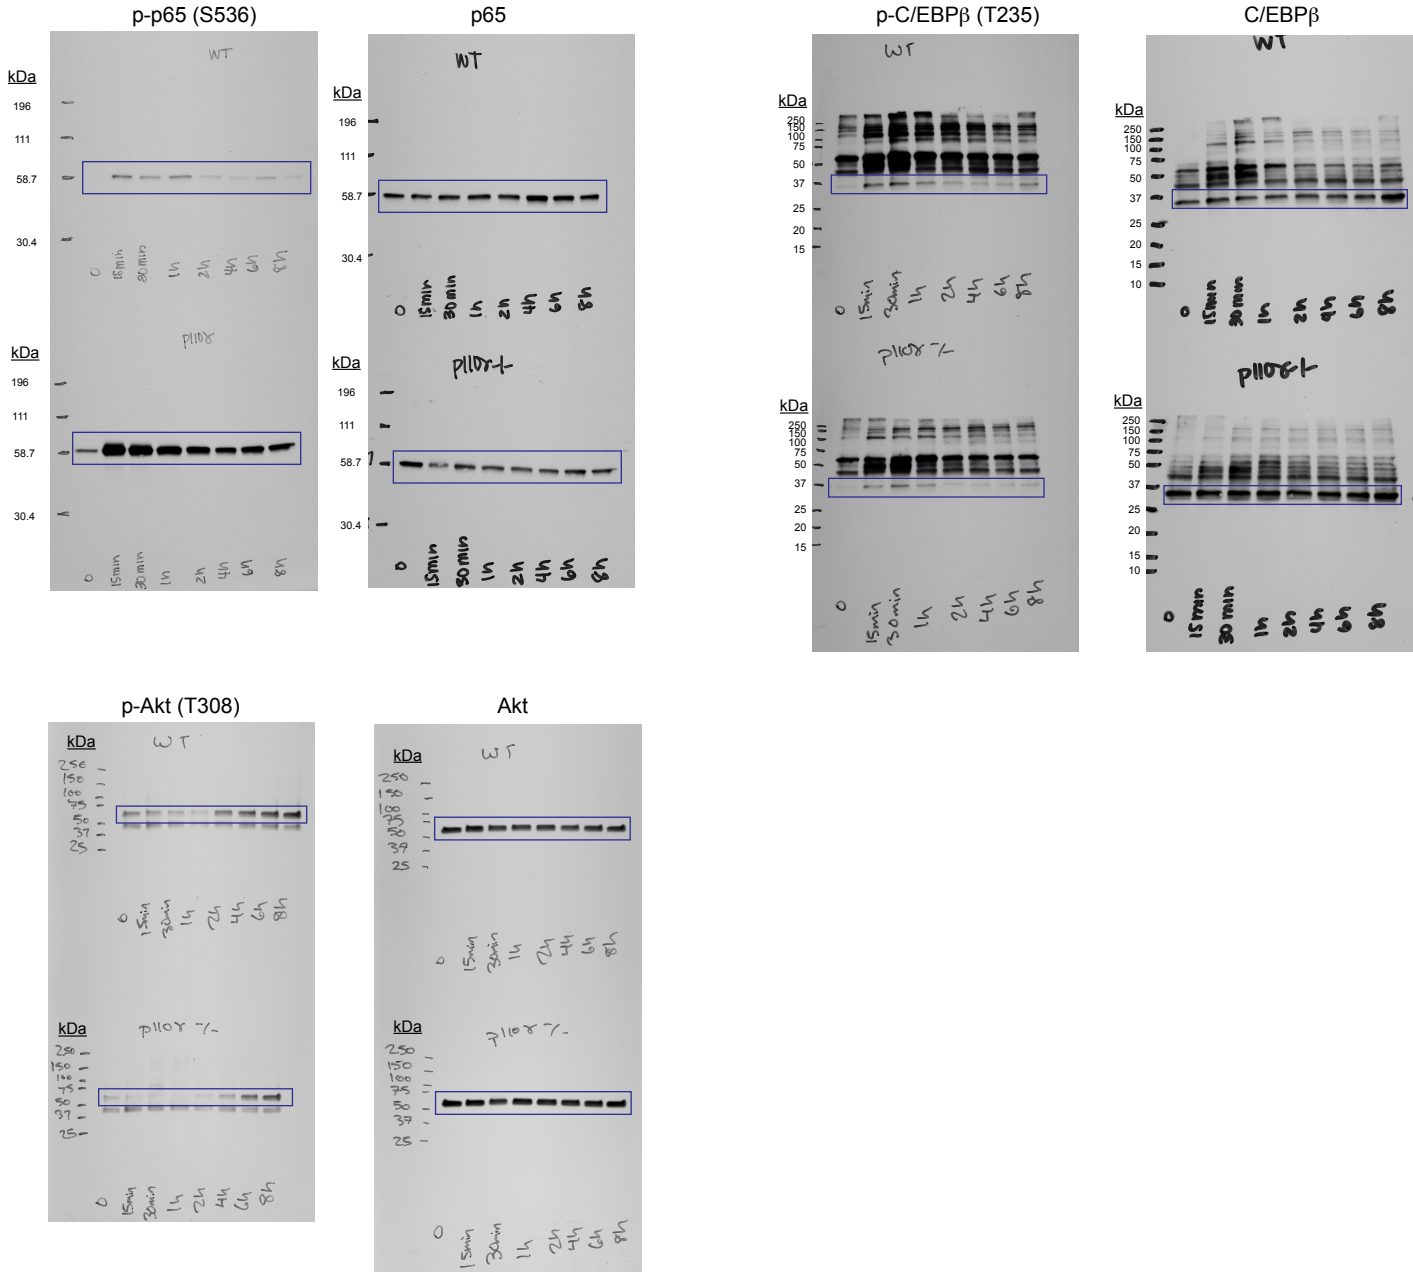

Figure 2g:

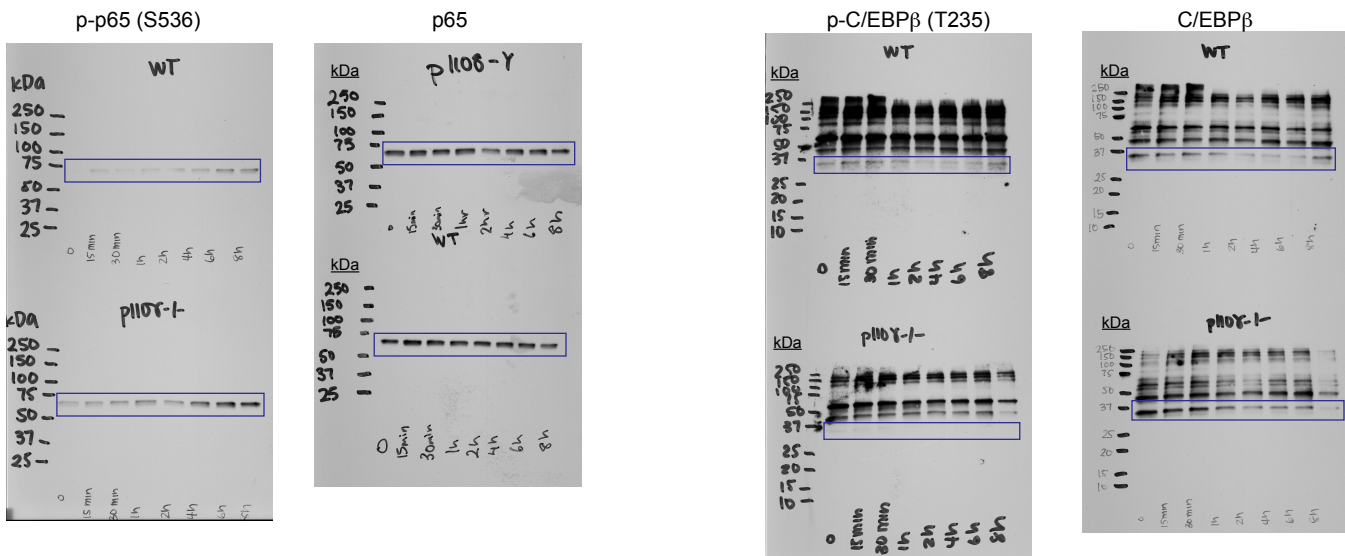

**Figure 2g (cont):**

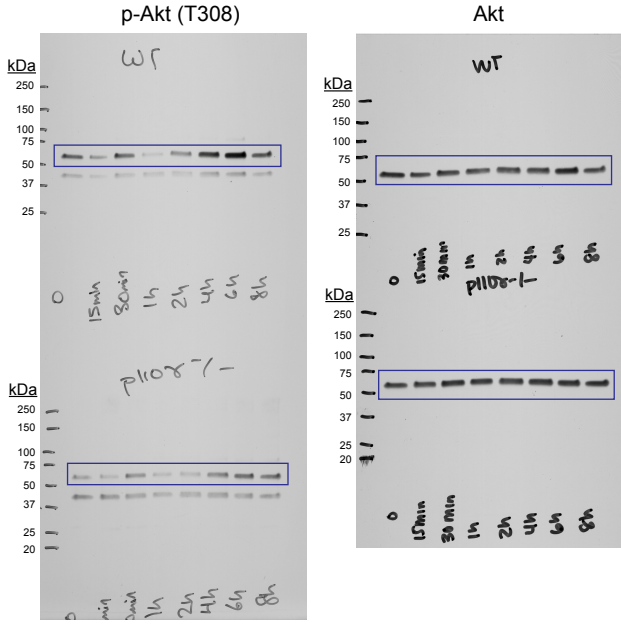

**Figure 2h:**

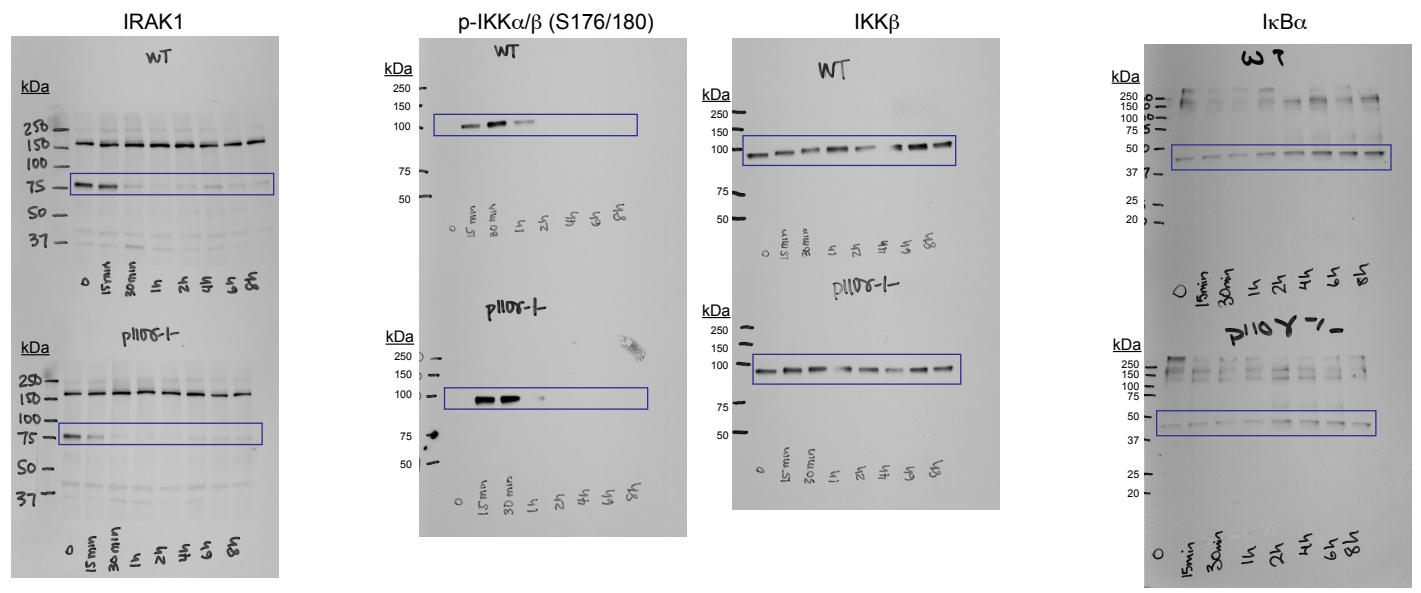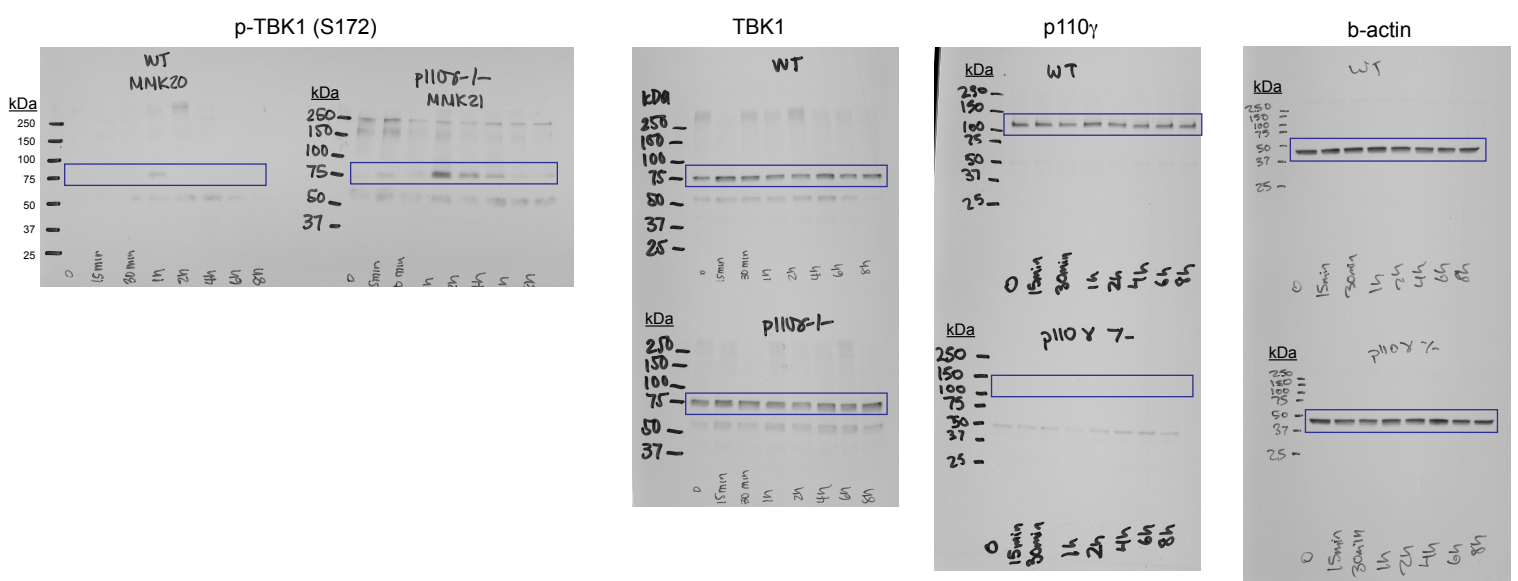

## Extended Data Figure 1h:

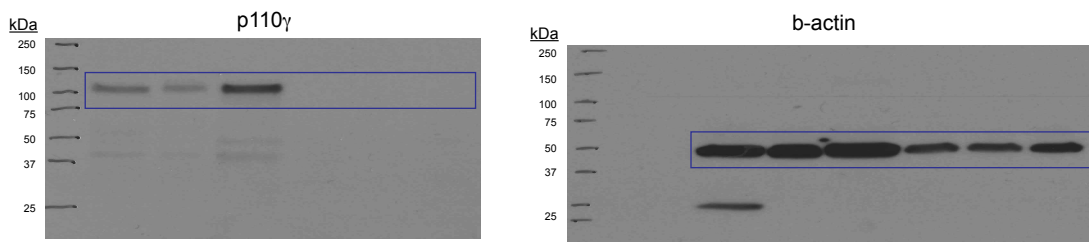

## Extended Data Figure 6b:

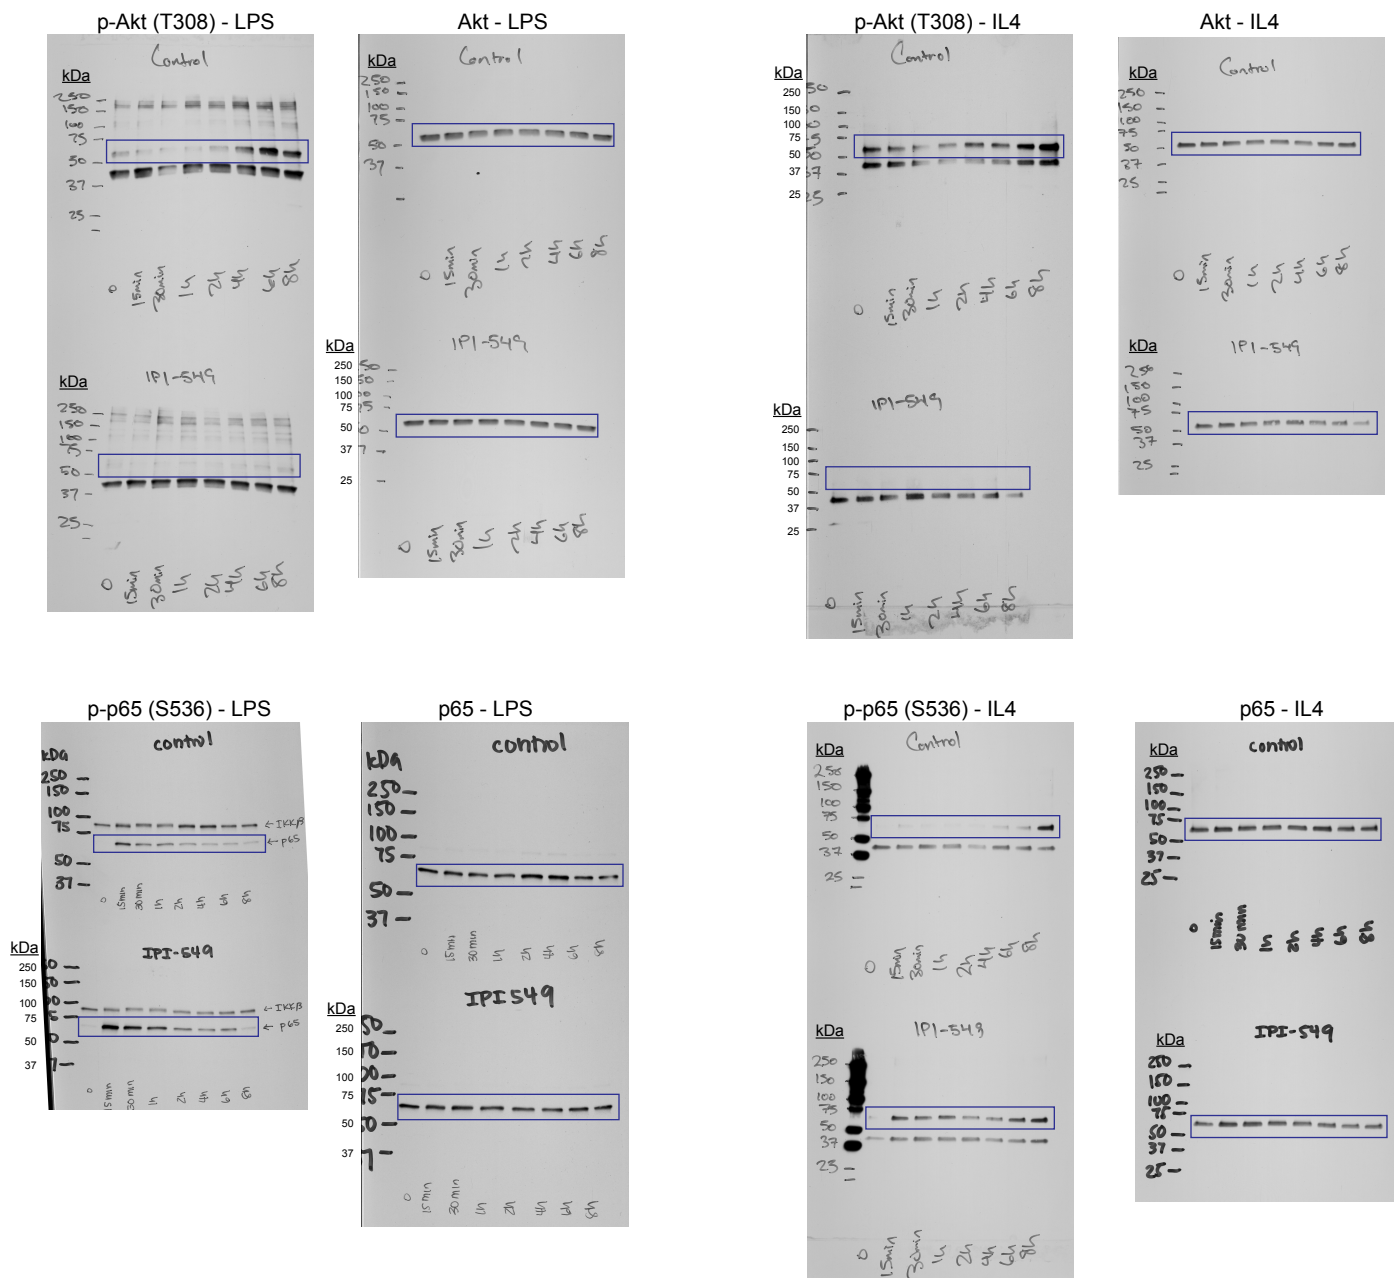

Supplement: NIHMS860097-supplement-Supplemental_Data.pdf [file NIHMS860097-supplement-Supplemental_Data.pdf]
